# Supplementary material for: A Colorimetric Sensor Enabled with Heterogeneous Nanozymes with Phosphatase-like Activity for the Residue Analysis of Methyl Parathion
Source: MDPI journal article supplement (doi:10.3390/foods12152980), 2023-08-07
Supplement: s1 [file s1]

# **Supporting Information**

## **A Colorimetric Sensor Enabled with Heterogeneous Nanozymes with Phosphatase-like Activity for the Residue Analysis of Methyl Parathion**

**Fengnian Zhao, Mengyue Li, Li Wang, Min Wang\***

College of Chemistry and Materials Engineering, Beijing Technology and Business University

\*Correspondence: wangm@th.btbu.edu.cn

**Figure S1.** TEM images of (a)  $\text{CeO}_2$ , (b) and (c)  $\text{pCeO}_2$  at different magnifications.

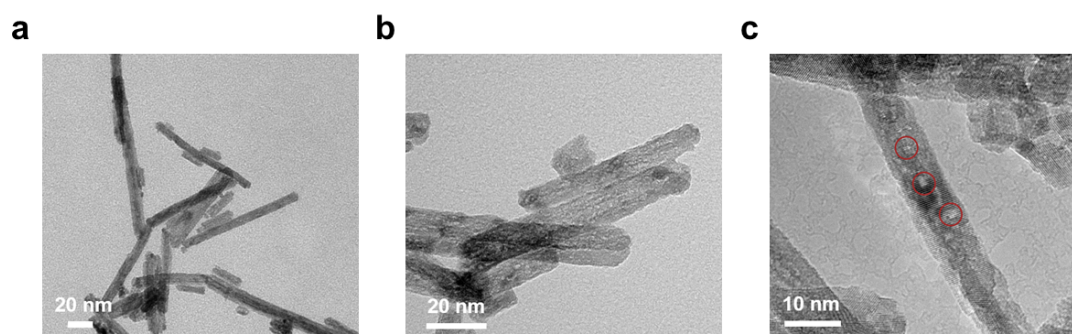

**Figure S2.** (a) Length and (b) width of pCeO<sub>2</sub>. (c) Size of AuNPs of Au-pCeO<sub>2</sub> nanozyme.

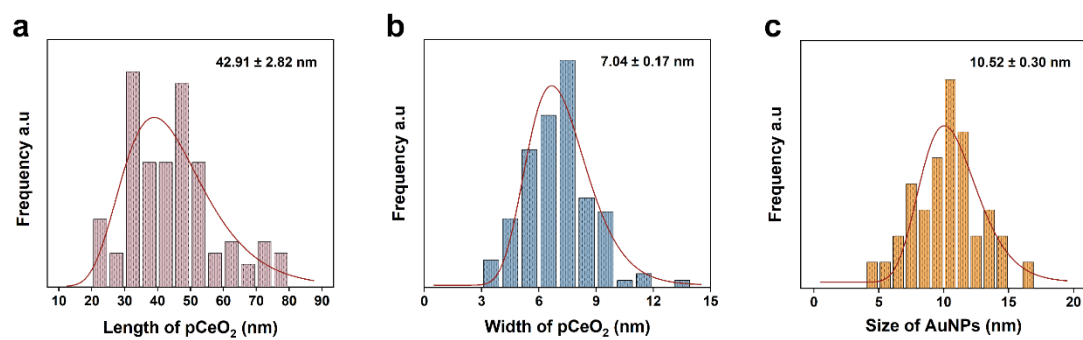

**Figure S3.** A standard curve of *p*-NP concentration versus absorbance change.

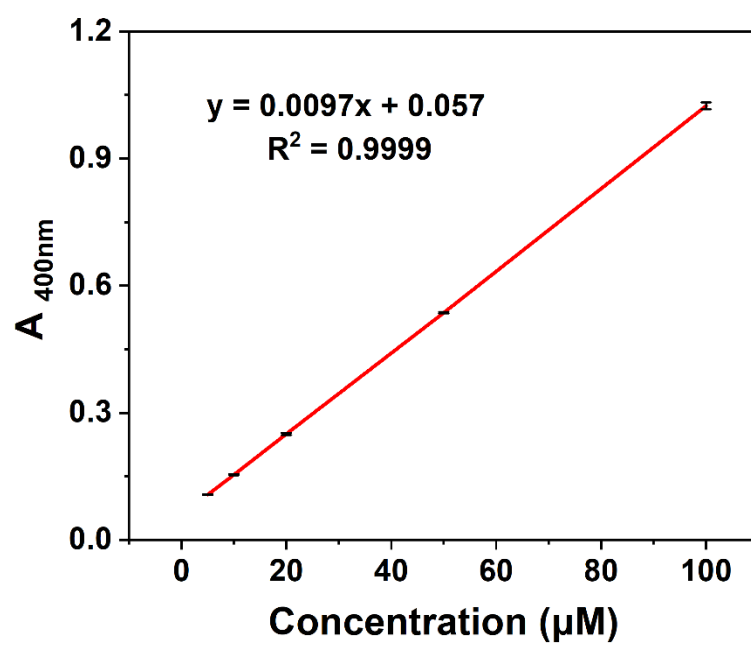

**Figure S4.** XPS spectra of the (a) Ce and (b) O of CeO<sub>2</sub>, (c) Ce and (d) O of pCeO<sub>2</sub>, (e) Ce, (f) O, and (g) Au of Au-pCeO<sub>2</sub>. (h) Proportions of Ce<sup>3+</sup> and Ce<sup>4+</sup> species in three nanozymes, which are simulated from XPS data.

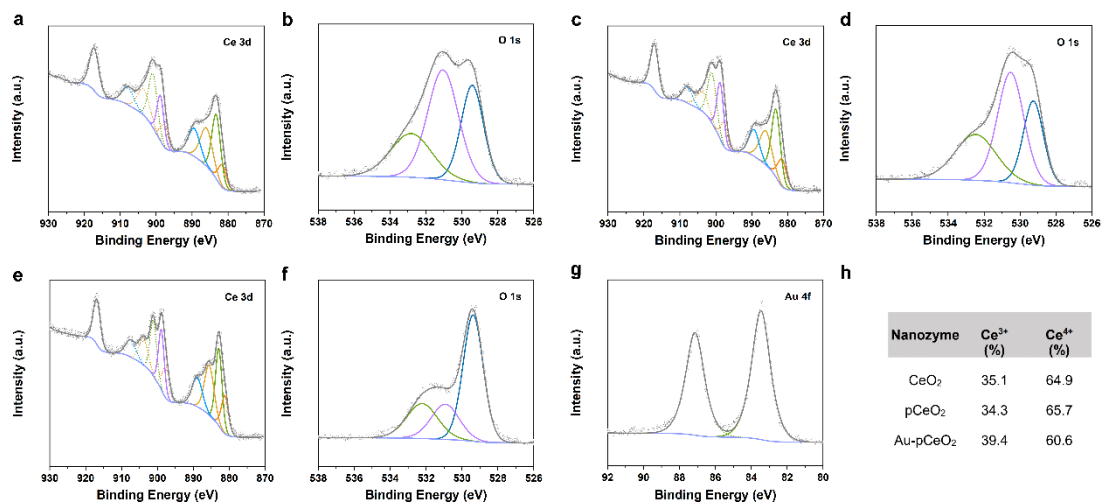

**Figure S5.** Digital photo of the hydrolysis product of different concentrations of MP under the working of Au-pCeO<sub>2</sub> nanozyme.

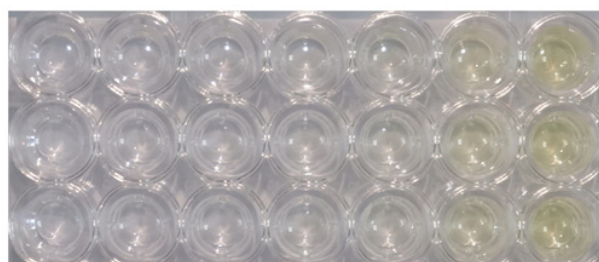

0  $\mu$ M~200  $\mu$ M

**Table S1.** Comparison of various phosphatase-like nanozymes for OP determination.

| Analytes         | Nanozymes            | Activity    | Linear range     | LOD          | Ref.      |
|------------------|----------------------|-------------|------------------|--------------|-----------|
| Paraoxon         | CeO <sub>2</sub> @NC | Phosphatase | 3–100 $\mu$ M    | –            | [1]       |
| Glyphosate       | ZrOX-OH              | Phosphatase | –                | 0.33 $\mu$ M | [2]       |
| Methyl parathion | ZIF-90               | Phosphatase | –                | –            | [3]       |
| Methyl paraoxon  | CeO <sub>2</sub>     | Phosphatase | 0.42–126 $\mu$ M | –            | [4]       |
| Methyl parathion | Au-pCeO <sub>2</sub> | Phosphatase | 5–200 $\mu$ M    | 0.5 $\mu$ M  | This work |

**Note:** CeO<sub>2</sub>@NC, CeO<sub>2</sub> embedded in N-doped carbon material substrate; ZrOX-OH, zirconium oxide-NaOH; ZIF-90, zeolitic imidazolate framework-90.

## References

1. Gai, P.; Pu, L.; Wang, C.; Zhu, D.; Li, F., CeO<sub>2</sub>@NC nanozyme with robust dephosphorylation ability of phosphotriester: A simple colorimetric assay for rapid and selective detection of paraoxon. *Biosens. Bioelectron.* **2023**, *220*, 114841.
2. Chang, J.; Yu, L.; Hou, T.; Hu, R.; Li, F., Direct and Specific Detection of Glyphosate Using a Phosphatase-like Nanozyme-Mediated Chemiluminescence Strategy. *Anal. Chem.* **2023**, *95*, (9), 4479-4485.
3. Fu, T.; Xu, C.; Guo, R.; Lin, C.; Huang, Y.; Tang, Y.; Wang, H.; Zhou, Q.; Lin, Y., Zeolitic Imidazolate Framework-90 Nanoparticles as Nanozymes to Mimic Organophosphorus Hydrolase. *ACS Appl. Nano Mater.* **2021**, *4*, (4), 3345-3350.
4. Wei, J.; Yang, L.; Luo, M.; Wang, Y.; Li, P., Nanozyme-assisted technique for dual mode detection of organophosphorus pesticide. *Ecotoxicol. Environ. Saf.* **2019**, *179*, 17-23.
